# Supplementary material for: Psychometric Validation and Cross-Cultural Adaptation of the Chinese Patient-Centered Communication Scale for Nurses
Source: Research Square preprint supplement (doi:10.21203/rs.3.rs-7442607/v1), 2025-09-22
Supplement: Supplementary file 1 [file fc3116e77786ca218f0ce783.docx]

**Original scale：**

**4** Identify the information patient/families want to know and provide it in a timely manner

**9** Check the patient or family’s level of understanding after providing the information

**5** Provide enough time to ask questions

**1** Describe the medical treatment/procedure or nursing intervention

**2** Describe the reason for the necessity of medical treatment/procedures or nursing intervention

**7** Use open-ended questions to allow the patient and family to express their feelings, needs, and opinions freely (e.g., “How are you feeling today?”)

**13** Encourage the patient or family to express any feelings they may experience related to the illness

**12** Look at the situation from the patient or family’s point of view and communicate with them

**8** Listen actively to the words of the patient and family members when communicating

**28** Communicate and share my negative and positive emotions while providing care with my fellows and/or medical staff (e.g., physician, fellow nurse, etc.)

**23** Introduce departments or other organizations that can help the patient or family (e.g., social work team, caregiver association, psychotherapy etc.)

**22** Collaborate across disciplines (e.g., physicians, nutritionist, physical therapist, etc.) to establish therapeutic interventions and aid patient and/or family’s understanding
